# Supplementary material
Source: PubMed Central journal article supplement (PMC6295236)
Supplement: NIHMS1515303-supplement-5.pdf [file NIHMS1515303-supplement-5.pdf]

**Supplementary Fig. 1.** Integrin  $\alpha v$  knockdown reduces VANGL2 membrane protein levels (plasma and intracellular). Western blot of fractionated cellular protein from non-targeting (NT) control and integrin  $\alpha v$  (ITGAV) #10 single siRNA transfected cells. Pan-cadherin antibody labeling shows enrichment for membrane proteins. The VANGL2 blot was re-probed with GAPDH antibody to serve as a loading control and to show enrichment for cytoplasmic proteins (experiment performed three times, n = 3 biological replicates).

**Supplementary Fig. 2.** Integrin  $\alpha v$  does not influence PRICKLE1 or VANGL1 protein levels and VANGL2 is unaffected by integrin  $\alpha 5\beta 1$  knockdown. (A) Western blots of total protein from non-targeting (NT) control and integrin  $\alpha v$  (ITGAV) knockdown HT-1080 cells. (B) Box

plot shows median value  $\pm$  standard deviation (whiskers) and the interquartile range (boxes) of likely variation. Integrin  $\alpha v$  knockdown cells have normal PRICKLE1 and VANGL1 protein levels (experiments performed three times,  $n = 16$  (PRICKLE1) and  $n = 10$  (VANGL1) biological replicates). **(C)** Western blots of total protein from NT control and integrin  $\alpha 5$  (ITGA5) knockdown cells. Integrin  $\alpha 5$  protein is reduced by 76%. **(D)** Box plot showing integrin  $\alpha 5$  knockdown cells have normal VANGL2 protein levels (experiment performed three times,  $n = 8$  biological replicates). **(E)** Western blots of total protein from NT control and integrin  $\beta 1$  (ITGB1) knockdown cells. Integrin  $\beta 1$  protein is reduced by 100%. **(F)** Box plot showing integrin  $\beta 1$  knockdown cells have normal VANGL2 protein levels (experiment performed three times,  $n = 8$  biological replicates).

**Supplementary Fig. 3.** Early endosomal VANGL2 localization in integrin  $\alpha v$  knockdown cells.

**(A)** Non-targeting (NT) control siRNA transfected cells expressing GFP-VANGL2 and immunolabeled for early endosome antigen 1 (EEA1). Nuclei are labeled with DAPI (blue). Arrows denote plasma membrane expression. **(B)** Integrin  $\alpha v$  (ITGAV) siRNA transfected cells expressing GFP-VANGL2 and with EEA1 and DAPI labeling. Certain double-positive vesicles are highlighted with arrowheads. Scale bars = 5  $\mu$ m.

**Supplementary Fig. 4.** VANGL2 protein expression in cells grown on different substrates.

Western blots of total VANGL2 protein levels in HT-1080 cells plated 48 h on untreated plastic, fibronectin (Fn), and vitronectin (Vn). Box plot shows median value  $\pm$  standard deviation (whiskers) and the interquartile range (boxes) of likely variation (experiment performed three

times, n = 8 biological replicates).  $**P < 0.01$ ;  $P$  values are versus VANGL2 expression in cells grown on untreated plastic; two-tailed unpaired  $t$ -test.
